# Supplementary material
Source: publisher figshare collection journal article supplement (https://tandf.figshare.com/ndownloader/files/15449516)
Supplement: Supplementary file 1 [file 15449516]

## SUPPLEMENTARY APPENDIX

This appendix has been provided by the authors to give readers additional information about their work.

Supplement to:

***Caragana korshinskii* phenylalanine ammonialyase is up-regulated in the phenylpropanoid biosynthesis pathway in response to drought stress**

Furong Liu, Lifang Xie, Zhenye Yao, Yulu Zhou, Wenfei Zhou, Junhui Wang, Yingying Sun and Chunmei Gong

Biotechnol. Biotechnol. Equip. 2019, **33**

### Supplemental data

**Table S1.** Sequence and length of primers for selected genes used in quantitative polymerase chain reaction (qPCR).

| Serial No. | Primer  | Primer sequence(5'-3')  | Amplicon length (bp) | Unigene No.    |
|------------|---------|-------------------------|----------------------|----------------|
| 1          | E13G-F  | ATTTGAGGTTGTCGTTGGGGA   | 185                  | Unigene0046190 |
|            | E13G-R  | ATCAGTGGGCGTTTGTATGG    |                      |                |
| 2          | LOX21-F | AAATACCTTGATTCTGGGGTTGC | 193                  | Unigene0014436 |
|            | LOX21-R | GGTTTCTGCGACAAACCTAACC  |                      |                |
| 3          | LEC2-F  | CTTCGTCTTCAGTGACTTCGCA  | 249                  | Unigene0045877 |
|            | LEC2-R  | CCATCGCCTTTTTCGTTTG     |                      |                |
| 4          | UPTG-F  | CCTGCAGCAGCACATTAAGAAC  | 130                  | Unigene0007522 |
|            | UPTG-R  | TGGGACACCCTCACGAAGACTA  |                      |                |
| 5          | PROD2-F | GCCTTTAACTCCGTTCACTACT  | 244                  | Unigene0026627 |
|            | PROD2-R | ACCTCATGACCCACATTCCG    |                      |                |
| 6          | PAL-F   | GGAGAAAAGGTCATATCACCAGG | 214                  | Unigene0024689 |
|            | PAL-R   | TGCCATAGGCTTTCAGACAAAC  |                      |                |

Classification of Raw Reads (HuL)

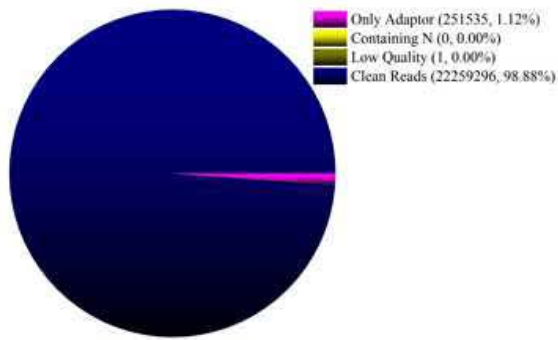

Distribution of Genes' Coverage (HuL)

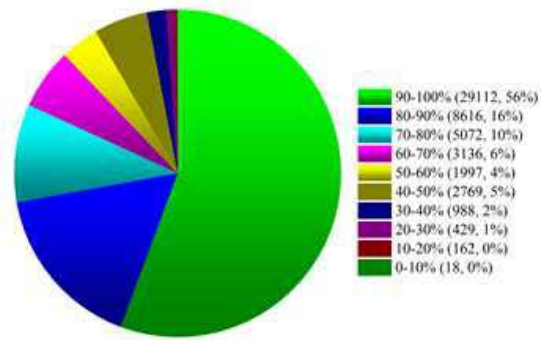

Classification of Raw Reads (YuL)

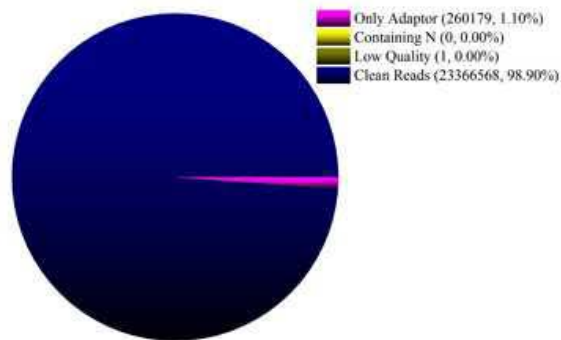

Distribution of Genes' Coverage (YuL)

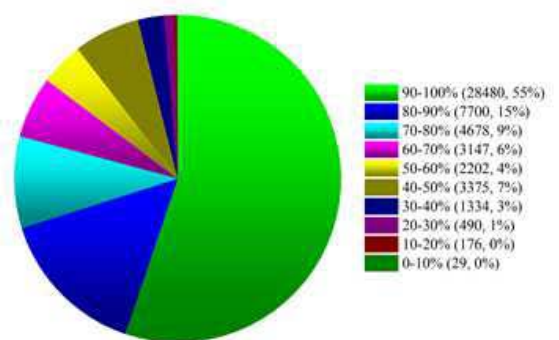

Classification of Raw Reads (DaB)

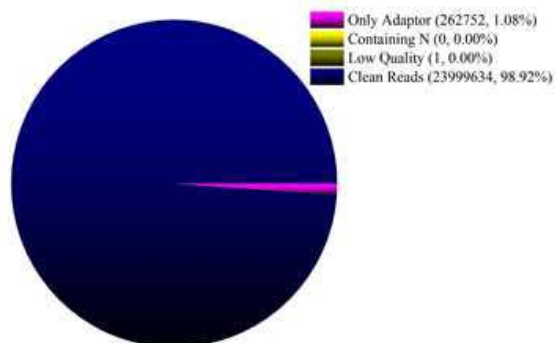

Distribution of Genes' Coverage (DaB)

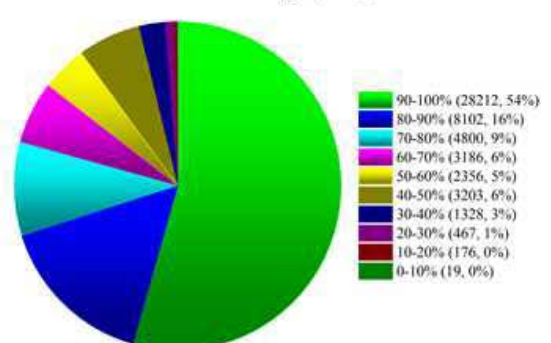

**Figure S1.** Distribution of gene coverage in RNA-sequence libraries constructed from *Caragana korshinskii* leaf samples collected from three sites (Huangling, Yulin and Dalad Banner) along a precipitation gradient on the Loess Plateau. HuL, Huangling; YuL, Yulin; DaB, Dalad Banner.

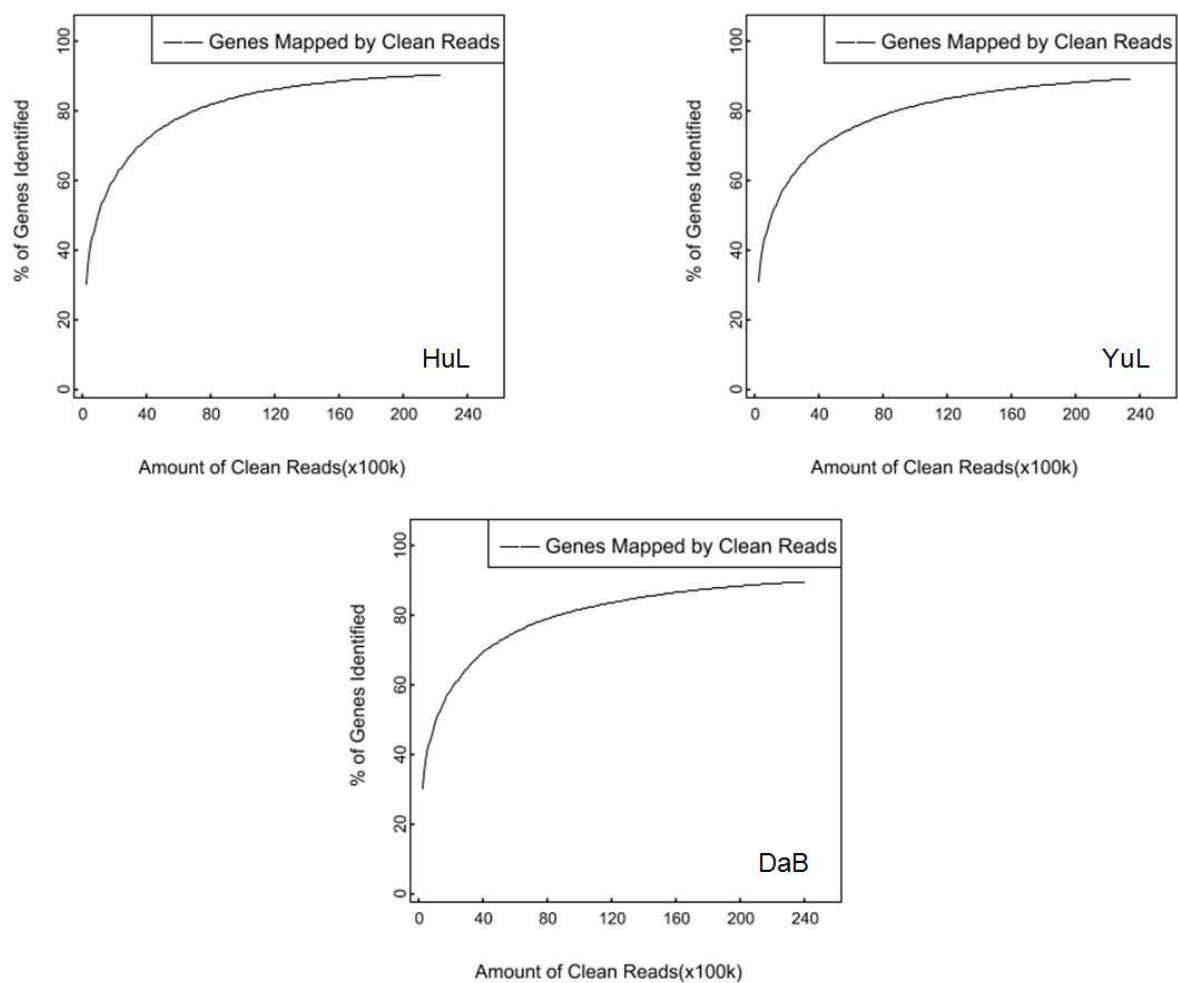

**Figure S2.** Sequencing data saturation in three *de novo* libraries constructed from *Caragana korshinskii* leaf samples collected from three sites (Huangling, Yulin and Dalad Banner) along a precipitation gradient on the Loess Plateau. HuL, Huangling; YuL, Yulin; DaB, Dalad Banner.

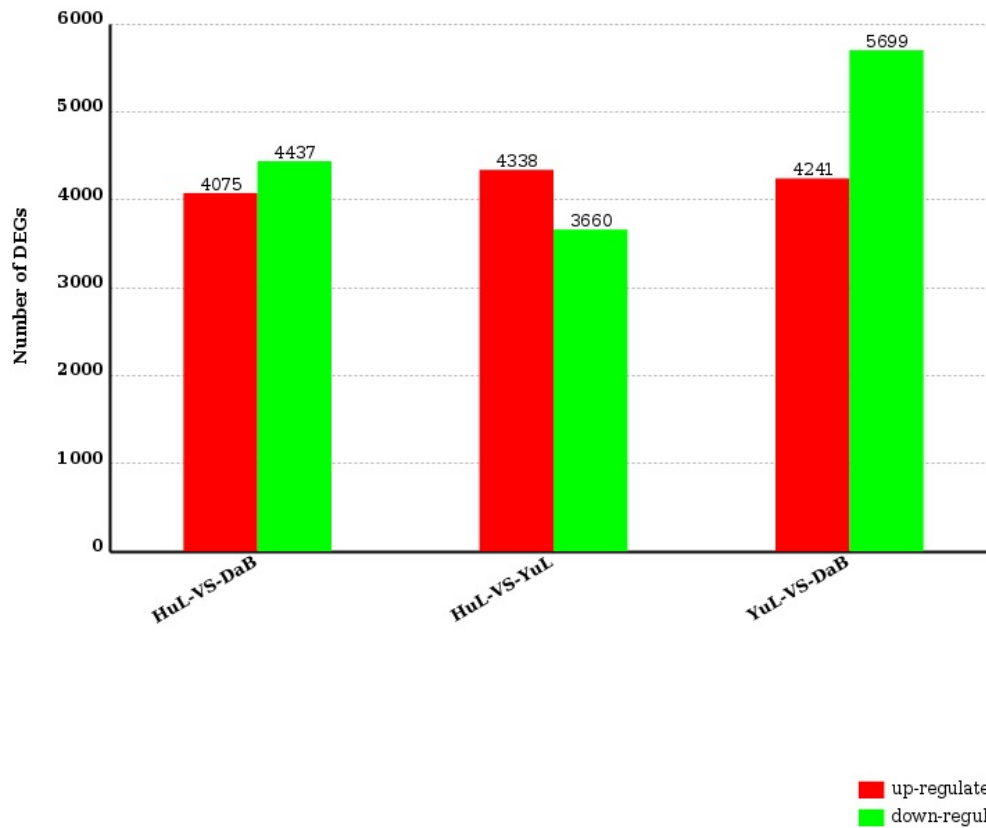

**Figure S3.** Expressed genes with significant up-regulation (in red) or down-regulation (in green) in RNA-sequence libraries constructed from *Caragana korshinskii* leaf samples collected from three sites (Huangling, Yulin and Dalad Banner) along a precipitation gradient on the Loess Plateau. HuL, Huangling; YuL, Yulin; DaB, Dalad Banner.

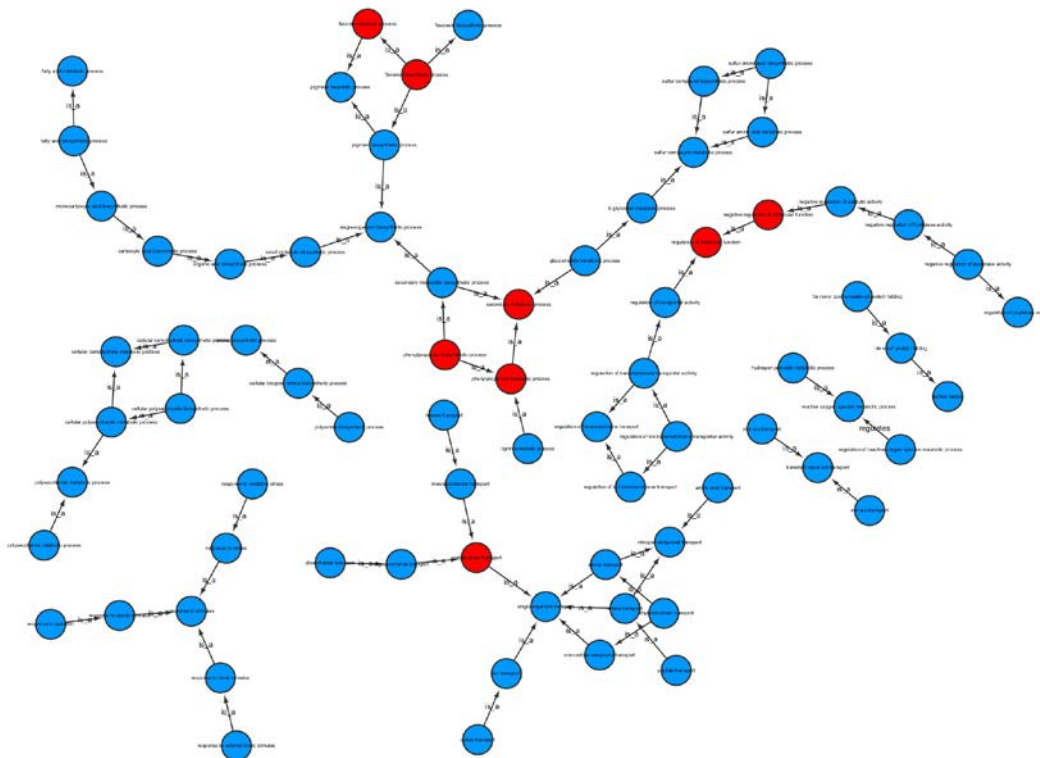

**Figure S4.** Major drought-related gene ontology (GO) terms (false discovery rate  $\leq 0.5$ ) of interactions and relationships in different trend profiles.
